# Supplementary material for: Filter prepared from Janus-like graphene oxide nanosheets with heterogeneous nanochannels for highly efficient dye removal
Source: Royal Society of Chemistry journal article supplement (doi:10.1039/d4en00228h), 2024-01-01
Supplement: d4en00228h1.pdf [file d4en00228h1.pdf]

## Supplementary data

### **Filter prepared from Janus-like graphene oxide nanosheets with heterogeneous nanochannels for highly efficient dye removal**

*Yingkun Song<sup>1+</sup>, Zejun Zhang<sup>1+</sup>, Hongsheng Yang<sup>1</sup>, Xin Luan<sup>2</sup>, Jianming Zhang<sup>1\*</sup>, and Gang Wei<sup>2\*</sup>*

*<sup>1</sup> Key Laboratory of Rubber-Plastics, Ministry of Education, Qingdao University of Science & Technology, Qingdao 266042, China*

*<sup>2</sup> College of Chemistry & Chemical Engineering, Qingdao University, Qingdao 266071, China*

<sup>+</sup> Equal contribution to this work

Corresponding authors:

E-mail: [zjm@qust.edu.cn](mailto:zjm@qust.edu.cn) (J.M. Zhang); [weigroup@qdu.edu.cn/wei@uni-bremen.de](mailto:weigroup@qdu.edu.cn/wei@uni-bremen.de) (G. Wei)

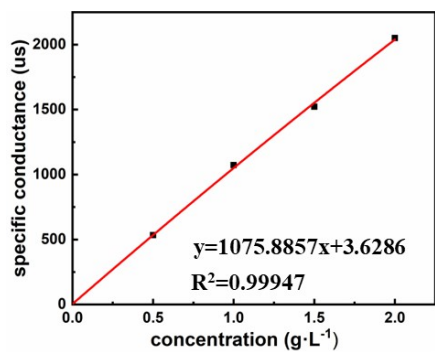

**NaCl**

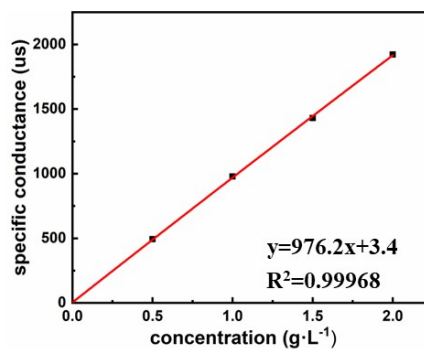

**Na<sub>2</sub>SO<sub>4</sub>**

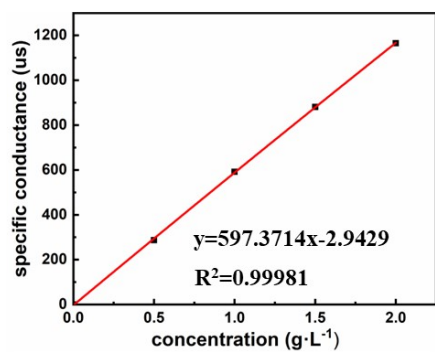

**MgCl<sub>2</sub>**

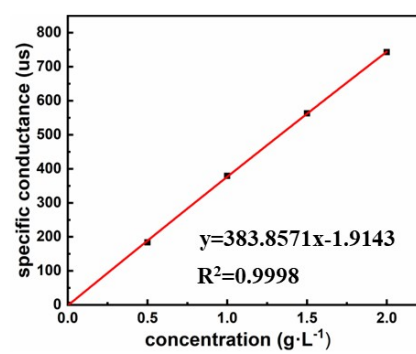

**MgSO<sub>4</sub>**

**Fig. S1.** Standard curves of different salt concentrations and conductivity.

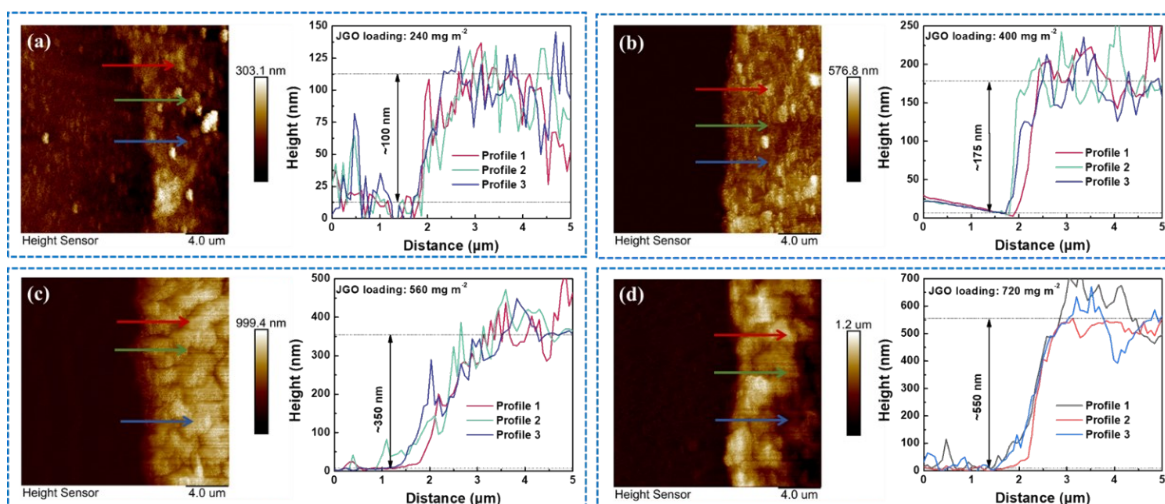

Fig. S2. Membrane thickness under different JGO loads.

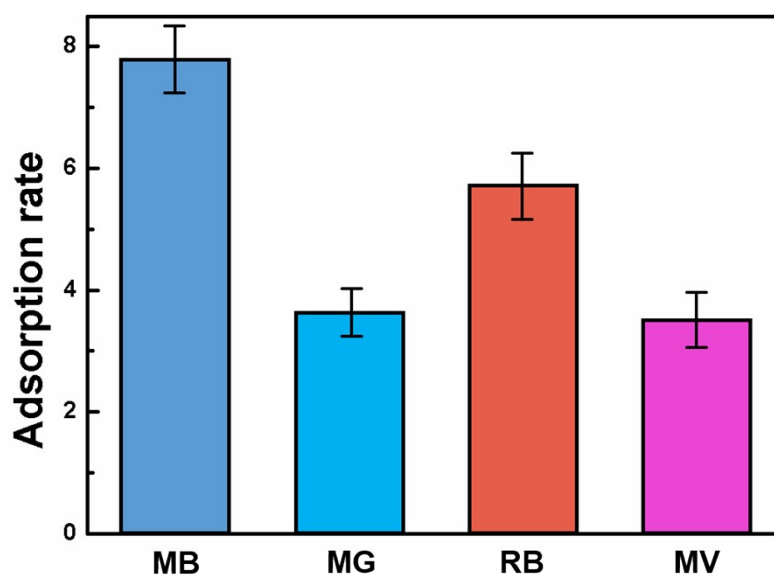

Fig. S3. Adsorption of different dyes by JGO filter.

**Table S1.** Rejection rate and Permeability of JGO filters for different types of dyes.

| Type of dye     | MW (g mol <sup>-1</sup> ) | Size (nm) | Analyte charge | Permeability<br>(L m <sup>-2</sup> h <sup>-1</sup> bar <sup>-1</sup> ) | Rejection (%) |
|-----------------|---------------------------|-----------|----------------|------------------------------------------------------------------------|---------------|
| Rhodamine B     | 479.01                    | 1.6×1.2   | +              | 122±10                                                                 | ~97.7         |
| Methyl Viologen | 408.03                    | 1.3×1.3   | +              | 138±5                                                                  | ~99.9         |
| Malachite Green | 364.91                    | 1.3×1.0   | -              | 125±10                                                                 | ~99.9         |
| Methylene Blue  | 327.33                    | 1.3×0.5   | +              | 110±8                                                                  | ~98.4         |

**Table S2.** Retention rate and flux of JGO filters for different types of inorganic salts.

| Salt                            | MW (g mol <sup>-1</sup> ) | Permeability<br>(L m <sup>-2</sup> h <sup>-1</sup> bar <sup>-1</sup> ) | Rejection (%) |
|---------------------------------|---------------------------|------------------------------------------------------------------------|---------------|
| NaCl                            | 58.44                     | 140±5                                                                  | ~7.85         |
| Na <sub>2</sub> SO <sub>4</sub> | 142.04                    | 139±10                                                                 | ~10.04        |
| MgCl <sub>2</sub>               | 95.21                     | 142±7                                                                  | ~10.39        |
| MgSO <sub>4</sub>               | 120.37                    | 137±5                                                                  | ~11.57        |

**Table S3.** Comparison of properties of JGO filters with other graphene filters.

| References                   | Materials | Type of dye    | Permeability<br>(L m <sup>-2</sup> h <sup>-1</sup> bar <sup>-1</sup> ) | Rejection<br>(%) |
|------------------------------|-----------|----------------|------------------------------------------------------------------------|------------------|
| This work                    | JGO       | RB             | 850                                                                    | ~65.9            |
|                              |           |                | 262                                                                    | ~84.2            |
|                              |           |                | 132                                                                    | ~97.6            |
|                              |           | MnB            | 118                                                                    | ~98.4            |
|                              |           | MV             | 143                                                                    | ~99.9            |
| 10.1039/d0ta00804d           | TNSC      | RB             | 400                                                                    | ~20              |
| 10.1038/ncomms3979           | NSC-GO    | RB             | 279                                                                    | ~87              |
|                              | GO        | MV             | 71                                                                     | ~80              |
|                              |           | MnB            | 71                                                                     | ~90              |
|                              |           | RB             | 71                                                                     | ~72              |
| 10.1016/j.scib.2018.05.015   | rGO       | DY             | 48                                                                     | ~67              |
|                              |           | MnB            | 56.3                                                                   | ~95.3            |
|                              |           | RB             | 56.3                                                                   | ~98              |
| 10.1016/j.carbon.2018.01.062 | GO        | MB             | 20.23                                                                  | ~90.15           |
|                              |           | EB             | 20.23                                                                  | ~98.68           |
| 10.1016/j.apsusc.2020.146308 | brGO      | MB             | 21.8                                                                   | ~99.2            |
| 10.1016/j.apsusc.2020.146308 | GO        | MB             | 27.6                                                                   | ~66              |
|                              |           | Pararosaniline | 53.7                                                                   | ~99.2            |
| 10.1021/es400571g            | GO        | MB             | 30                                                                     | ~95              |
